# Supplementary material
Source: PubMed Central journal article supplement (PMC7499246)
Supplement: jamaoncol-e204232-s001.pdf [file jamaoncol-e204232-s001.pdf]

## Supplementary Online Content

Pathak R, Goldberg SB, Canavan M, et al. Association of survival with adjuvant chemotherapy among patients with early-stage non-small cell lung cancer with vs without high-risk clinicopathologic features. *JAMA Oncol*. Published online September 17, 2020. doi:10.1001/jamaoncol.2020.4232

**eTable 1.** Propensity Score–Adjusted Multivariable Cox Regression Model for Overall Survival in Tumors  $\leq 3$  cm

**eTable 2.** Propensity Score–Adjusted Multivariable Cox Regression Model for Overall Survival in Tumors  $>3$ -4 cm

**eTable 3.** Propensity Score–Adjusted Multivariable Cox Regression Model for Overall Survival in Tumors  $>4$ -5 cm

**eTable 4.** Propensity Score–Adjusted Multivariable Cox Regression Model for Overall Survival in Tumors  $>5$ -7 cm

**eTable 5.** Association of High-Risk Features and Survival After Adjuvant Chemotherapy in Different Tumor Size Categories ( $\leq 3$  cm,  $>3$ -4 cm,  $>4$ -5 cm and  $>5$ -7 cm)

**eTable 6.** Association of High-Risk Features and Survival After Adjuvant Chemotherapy in  $\leq 3$  cm Tumors After Adjustments for Clinically Significant Interactions

**eTable 7.** Association of Sublobar Surgery With Survival After Adjuvant Chemotherapy in  $\leq 4$  cm Cohort According to 1-cm Tumor Size Increments

**eTable 8.** Association of High-Risk Features and Survival (Measured From the Date of Diagnosis) After Adjuvant Chemotherapy in Different Tumor Size Categories ( $\leq 3$  cm,  $>3$ -4 cm,  $>4$ -5 cm and  $>5$ -7 cm)

This supplementary material has been provided by the authors to give readers additional information about their work.

**eTable 1.** Propensity Score–Adjusted Multivariable Cox Regression Model for Overall Survival in Tumors ≤3 cm

| Variables                            | Adjusted HR |           |         |
|--------------------------------------|-------------|-----------|---------|
|                                      | AHR         | 95% CI    | P Value |
| <b>Treatment</b>                     |             |           |         |
| Observation                          | 1           | Ref       |         |
| Adjuvant chemotherapy                | 1.25        | 1.10-1.41 | .001    |
| <b>Age</b>                           | 1.03        | 1.03-1.03 | <.001   |
| <b>Sex</b>                           |             |           |         |
| Male                                 | 1           | Ref       |         |
| Female                               | 0.72        | 0.69-0.75 | <.001   |
| <b>Race</b>                          |             |           |         |
| White                                | 1           | Ref       |         |
| Non-white                            | 0.88        | 0.81-0.95 | .001    |
| <b>Insurance</b>                     |             |           |         |
| Not insured                          | 1.30        | 1.07-1.57 | .01     |
| Private insurance                    | 1           | Ref       |         |
| Medicaid                             | 1.54        | 1.38-1.73 | <.001   |
| Medicare                             | 1.14        | 1.07-1.22 | <.001   |
| Other government                     | 1.15        | 0.90-1.46 | .26     |
| <b>Facility type</b>                 |             |           |         |
| Non-academic <sup>a</sup>            | 1.12        | 1.06-1.18 | <.001   |
| Academic                             | 1           | Ref       |         |
| <b>Facility location</b>             |             |           |         |
| Northeast                            | 1           | Ref       |         |
| Midwest                              | 1.18        | 1.10-1.27 | <.001   |
| South                                | 1.19        | 1.11-1.27 | <.001   |
| West                                 | 1.13        | 1.03-1.24 | .01     |
| <b>Area of residence<sup>b</sup></b> |             |           |         |
| Rural                                | 0.98        | 0.84-1.14 | .76     |
| Urban                                | 1.06        | 1.00-1.14 | .07     |
| Metropolitan                         | 1           | Ref       |         |
| <b>Median income</b>                 |             |           |         |
| <38000                               | 1.16        | 1.06-1.28 | .002    |
| 38000 to 47999                       | 1.13        | 1.04-1.22 | .004    |
| 48000 to 62999                       | 1.10        | 1.02-1.18 | .01     |
| >63000                               | 1           | Ref       |         |

|                                           | Adjusted HR |           |         |
|-------------------------------------------|-------------|-----------|---------|
|                                           | AHR         | 95% CI    | P Value |
| <b>Education, %<sup>c</sup></b>           |             |           |         |
| ≥21                                       | 1.18        | 1.06-1.30 | .002    |
| 13 to 20.9                                | 1.17        | 1.07-1.27 | .002    |
| 7 to 12.9                                 | 1.13        | 1.05-1.21 | .002    |
| <7                                        | 1           | Ref       |         |
| <b>Year of diagnosis</b>                  |             |           |         |
| 2010                                      | 1           | Ref       |         |
| 2011                                      | 0.96        | 0.90-1.03 | .28     |
| 2012                                      | 0.89        | 0.82-0.95 | .001    |
| 2013                                      | 0.90        | 0.84-0.97 | .01     |
| 2014                                      | 0.86        | 0.79-0.93 | .002    |
| 2015                                      | 0.83        | 0.75-0.91 | .001    |
| <b>Histology</b>                          |             |           |         |
| Adenocarcinoma                            | 1           | Ref       |         |
| SCC                                       | 1.07        | 1.02-1.13 | .01     |
| Large cell                                | 1.55        | 1.36-1.77 | <.001   |
| Other <sup>d</sup>                        | 1.14        | 0.98-1.32 | .09     |
| <b>Laterality</b>                         |             |           |         |
| Right                                     | 1           | Ref       |         |
| Left                                      | 0.97        | 0.92-1.01 | .16     |
| <b>Primary site</b>                       |             |           |         |
| Main bronchus                             | 1.56        | 0.35-6.91 | .56     |
| Upper lobe                                | 1           | Ref       |         |
| Middle lobe                               | 1.15        | 1.04-1.28 | .01     |
| Lower lobe                                | 1.07        | 1.01-1.12 | .01     |
| Overlapping lesion                        | 1.06        | 0.76-1.49 | .74     |
| Lung, NOS                                 | 1.06        | 0.85-1.32 | .60     |
| <b>VPI</b>                                |             |           |         |
| Absent                                    | 1           | Ref       |         |
| Present                                   | 1.10        | 1.01-1.19 | .03     |
| <b>LVI</b>                                |             |           |         |
| Absent                                    | 1           | Ref       |         |
| Present                                   | 1.41        | 1.32-1.51 | <.001   |
| <b>Grade</b>                              |             |           |         |
| Well differentiated                       | 1           | Ref       |         |
| Moderately differentiated                 | 1.49        | 1.37-1.61 | <.001   |
| Poorly differentiated or undifferentiated | 1.80        | 1.65-1.96 | <.001   |

| Variables                  | Adjusted HR |           |         |
|----------------------------|-------------|-----------|---------|
|                            | AHR         | 95% CI    | P Value |
| <b>Surgical resection</b>  |             |           |         |
| Sublobar resection         | 1.42        | 1.34-1.50 | <.001   |
| Lobectomy                  | 1           | Ref       |         |
| Pneumonectomy              | 2.04        | 1.62-2.55 | <.001   |
| <b>Charlson-Deyo score</b> |             |           |         |
| 0                          | 1           | Ref       |         |
| 1                          | 1.21        | 1.15-1.28 | <.001   |
| ≥2                         | 1.54        | 1.45-1.64 | <.001   |

AHR=Adjusted hazard ratio; CI=Confidence interval; Ref=Reference; NOS=Not otherwise specified; VPI=Visceral pleural invasion; LVI=Lymphovascular invasion.

<sup>a</sup>Includes Community Cancer Program, Comprehensive Community Cancer Program, Integrated Network Cancer Program, and other specified types of cancer programs.

<sup>b</sup>Based on patient's zip code area.

<sup>c</sup>Percent of people in the patient's zip code area with no high-school diploma.

<sup>d</sup>Non-small cell not further defined.

**eTable 2.** Propensity Score–Adjusted Multivariable Cox Regression Model for Overall Survival in Tumors >3-4 cm

| Variables                            | Adjusted HR |           |         |
|--------------------------------------|-------------|-----------|---------|
|                                      | AHR         | 95% CI    | P Value |
| <b>Treatment</b>                     |             |           |         |
| Observation                          | 1           | Ref       |         |
| Adjuvant chemotherapy                | 0.93        | 0.81-1.16 | .08     |
| <b>Age</b>                           | 1.03        | 1.02-1.04 | <.001   |
| <b>Sex</b>                           |             |           |         |
| Male                                 | 1           | Ref       |         |
| Female                               | 0.76        | 0.69-0.83 | <.001   |
| <b>Race</b>                          |             |           |         |
| White                                | 1           | Ref       |         |
| Non-white                            | 0.77        | 0.66-0.90 | .001    |
| <b>Insurance</b>                     |             |           |         |
| Not insured                          | 1.13        | 0.80-1.60 | .48     |
| Private insurance                    | 1           | Ref       |         |
| Medicaid                             | 1.29        | 1.02-1.63 | .03     |
| Medicare                             | 1.08        | 0.95-1.22 | .23     |
| Other government                     | 1.18        | 0.78-1.78 | .43     |
| <b>Facility type</b>                 |             |           |         |
| Non-academic <sup>a</sup>            | 1.03        | 0.93-1.14 | .56     |
| Academic                             | 1           | Ref       |         |
| <b>Facility location</b>             |             |           |         |
| Northeast                            | 1           | Ref       |         |
| Midwest                              | 1.24        | 1.07-1.43 | .004    |
| South                                | 1.22        | 1.07-1.40 | .003    |
| West                                 | 1.28        | 1.08-1.51 | .004    |
| <b>Area of residence<sup>b</sup></b> |             |           |         |
| Rural                                | 1.02        | 0.77-1.35 | .92     |
| Urban                                | 1.06        | 0.94-1.20 | .33     |
| Metropolitan                         | 1           | Ref       |         |
| <b>Median income</b>                 |             |           |         |
| <38000                               | 1.26        | 1.06-1.51 | .01     |
| 38000 to 47999                       | 1.13        | 0.97-1.32 | .12     |
| 48000 to 62999                       | 1.07        | 0.93-1.22 | .34     |
| >63000                               | 1           | Ref       |         |

| Variables                                 | Adjusted HR |           |         |
|-------------------------------------------|-------------|-----------|---------|
|                                           | AHR         | 95% CI    | P Value |
| <b>Education, %<sup>c</sup></b>           |             |           |         |
| ≥21                                       | 0.97        | 0.80-1.17 | .72     |
| 13 to 20.9                                | 0.94        | 0.80-1.10 | .45     |
| 7 to 12.9                                 | 0.97        | 0.85-1.12 | .68     |
| <7                                        | 1           | Ref       |         |
| <b>Year of diagnosis</b>                  |             |           |         |
| 2010                                      | 1           | Ref       |         |
| 2011                                      | 0.97        | 0.85-1.11 | .66     |
| 2012                                      | 0.94        | 0.82-1.08 | .37     |
| 2013                                      | 0.97        | 0.84-1.11 | .64     |
| 2014                                      | 0.78        | 0.66-0.92 | .004    |
| 2015                                      | 0.89        | 0.74-1.07 | .20     |
| <b>Histology</b>                          |             |           |         |
| Adenocarcinoma                            | 1           | Ref       |         |
| SCC                                       | 1.09        | 0.99-1.20 | .06     |
| Large cell                                | 1.53        | 1.19-1.98 | .001    |
| Other <sup>d</sup>                        | 0.98        | 0.74-1.29 | .86     |
| <b>Laterality</b>                         |             |           |         |
| Right                                     | 1           | Ref       |         |
| Left                                      | 0.92        | 0.84-1.01 | .08     |
| <b>Primary site</b>                       |             |           |         |
| Main bronchus                             | 0.50        | 0.13-2.01 | .33     |
| Upper lobe                                | 1           | Ref       |         |
| Middle lobe                               | 1.05        | 0.85-1.30 | .65     |
| Lower lobe                                | 1.03        | 0.93-1.13 | .57     |
| Overlapping lesion                        | 0.88        | 0.61-1.26 | .49     |
| Lung, NOS                                 | 0.99        | 0.70-1.42 | .97     |
| <b>VPI</b>                                |             |           |         |
| Absent                                    | 1           | Ref       |         |
| Present                                   | 1.15        | 1.00-1.32 | .05     |
| <b>LVI</b>                                |             |           |         |
| Absent                                    | 1           | Ref       |         |
| Present                                   | 1.22        | 1.08-1.38 | .001    |
| <b>Grade</b>                              |             |           |         |
| Well differentiated                       | 1           | Ref       |         |
| Moderately differentiated                 | 1.40        | 1.17-1.66 | .002    |
| Poorly differentiated or undifferentiated | 1.57        | 1.31-1.87 | <.001   |

| Variables                  | Adjusted HR |           |         |
|----------------------------|-------------|-----------|---------|
|                            | AHR         | 95% CI    | P Value |
| <b>Surgical resection</b>  |             |           |         |
| Sublobar resection         | 1.59        | 1.39-1.81 | <.001   |
| Lobectomy                  | 1           | Ref       |         |
| Pneumonectomy              | 1.36        | 1.02-1.81 | .04     |
| <b>Charlson-Deyo score</b> |             |           |         |
| 0                          | 1           | Ref       |         |
| 1                          | 1.17        | 1.06-1.29 | .003    |
| ≥2                         | 1.32        | 1.17-1.49 | <.001   |

AHR=Adjusted hazard ratio; CI=Confidence interval; Ref=Reference; NOS=Not otherwise specified; VPI=Visceral pleural invasion; LVI=Lymphovascular invasion.

<sup>a</sup>Includes Community Cancer Program, Comprehensive Community Cancer Program, Integrated Network Cancer Program, and other specified types of cancer programs.

<sup>b</sup>Based on patient's zip code area.

<sup>c</sup>Percent of people in the patient's zip code area with no high-school diploma.

<sup>d</sup>Non-small cell not further defined.

**eTable 3.** Propensity Score–Adjusted Multivariable Cox Regression Model for Overall Survival in Tumors >4-5 cm

| Variables                            | Adjusted HR |           |         |
|--------------------------------------|-------------|-----------|---------|
|                                      | AHR         | 95% CI    | P Value |
| <b>Treatment</b>                     |             |           |         |
| Observation                          | 1           | Ref       |         |
| Adjuvant chemotherapy                | 0.75        | 0.65-0.87 | .003    |
| <b>Age</b>                           | 1.03        | 1.02-1.03 | <.001   |
| <b>Sex</b>                           |             |           |         |
| Male                                 | 1           | Ref       |         |
| Female                               | 0.76        | 0.67-0.86 | <.001   |
| <b>Race</b>                          |             |           |         |
| White                                | 1           | Ref       |         |
| Non-white                            | 0.96        | 0.79-1.17 | .69     |
| <b>Insurance</b>                     |             |           |         |
| Not insured                          | 1.56        | 1.04-2.32 | .03     |
| Private insurance                    | 1           | Ref       |         |
| Medicaid                             | 1.01        | 0.72-1.41 | .97     |
| Medicare                             | 1.06        | 0.90-1.26 | .48     |
| Other government                     | 1.10        | 0.63-1.92 | .74     |
| <b>Facility type</b>                 |             |           |         |
| Non-academic <sup>a</sup>            | 1.10        | 0.96-1.26 | .16     |
| Academic                             | 1           | Ref       |         |
| <b>Facility location</b>             |             |           |         |
| Northeast                            | 1           | Ref       |         |
| Midwest                              | 1.32        | 1.10-1.59 | .003    |
| South                                | 1.18        | 0.98-1.41 | .08     |
| West                                 | 0.97        | 0.76-1.23 | .81     |
| <b>Area of residence<sup>b</sup></b> |             |           |         |
| Rural                                | 1.14        | 0.79-1.66 | .48     |
| Urban                                | 1.04        | 0.88-1.24 | .64     |
| Metropolitan                         | 1           | Ref       |         |
| <b>Median income</b>                 |             |           |         |
| <38000                               | 0.95        | 0.74-1.21 | .65     |
| 38000 to 47999                       | 0.91        | 0.74-1.11 | .35     |
| 48000 to 62999                       | 0.91        | 0.76-1.08 | .28     |
| >63000                               | 1           | Ref       |         |



| Variables                                 | Adjusted HR |           |         |
|-------------------------------------------|-------------|-----------|---------|
|                                           | AHR         | 95% CI    | P Value |
| <b>Education, %<sup>c</sup></b>           |             |           |         |
| ≥21                                       | 1.06        | 0.81-1.38 | .66     |
| 13 to 20.9                                | 1.11        | 0.89-1.37 | .36     |
| 7 to 12.9                                 | 1.08        | 0.90-1.30 | .39     |
| <7                                        | 1           | Ref       |         |
| <b>Year of diagnosis</b>                  |             |           |         |
| 2010                                      | 1           | Ref       |         |
| 2011                                      | 1.11        | 0.92-1.34 | .26     |
| 2012                                      | 0.96        | 0.79-1.17 | .70     |
| 2013                                      | 1.14        | 0.94-1.39 | .18     |
| 2014                                      | 1.03        | 0.83-1.28 | .80     |
| 2015                                      | 1.13        | 0.90-1.44 | .29     |
| <b>Histology</b>                          |             |           |         |
| Adenocarcinoma                            | 1           | Ref       |         |
| SCC                                       | 1.08        | 0.95-1.23 | .25     |
| Large cell                                | 1.81        | 1.34-2.44 | .004    |
| Other <sup>d</sup>                        | 1.11        | 0.76-1.62 | .60     |
| <b>Laterality</b>                         |             |           |         |
| Right                                     | 1           | Ref       |         |
| Left                                      | 1.00        | 0.88-1.13 | .96     |
| <b>Primary site</b>                       |             |           |         |
| Main bronchus                             | 0.83        | 0.36-1.90 | .66     |
| Upper lobe                                | 1           | Ref       |         |
| Middle lobe                               | 1.31        | 0.99-1.73 | .06     |
| Lower lobe                                | 1.01        | 0.89-1.14 | .91     |
| Overlapping lesion                        | 1.36        | 0.87-2.11 | .18     |
| Lung, NOS                                 | 0.89        | 0.50-1.58 | .70     |
| <b>VPI</b>                                |             |           |         |
| Absent                                    | 1           | Ref       |         |
| Present                                   | 1.33        | 1.12-1.59 | .001    |
| <b>LVI</b>                                |             |           |         |
| Absent                                    | 1           | Ref       |         |
| Present                                   | 1.24        | 1.06-1.45 | .01     |
| <b>Grade</b>                              |             |           |         |
| Well differentiated                       | 1           | Ref       |         |
| Moderately differentiated                 | 1.48        | 1.14-1.91 | .003    |
| Poorly differentiated or undifferentiated | 1.62        | 1.25-2.10 | .002    |

| Variables                  | Adjusted HR |           |         |
|----------------------------|-------------|-----------|---------|
|                            | AHR         | 95% CI    | P Value |
| <b>Surgical resection</b>  |             |           |         |
| Sublobar resection         | 1.71        | 1.38-2.13 | <.001   |
| Lobectomy                  | 1           | Ref       |         |
| Pneumonectomy              | 1.19        | 0.88-1.61 | .27     |
| <b>Charlson-Deyo score</b> |             |           |         |
| 0                          | 1           | Ref       |         |
| 1                          | 1.06        | 0.93-1.22 | .38     |
| ≥2                         | 1.52        | 1.30-1.78 | <.001   |

AHR=Adjusted hazard ratio; CI=Confidence interval; Ref=Reference; NOS=Not otherwise specified; VPI=Visceral pleural invasion; LVI=Lymphovascular invasion.

<sup>a</sup>Includes Community Cancer Program, Comprehensive Community Cancer Program, Integrated Network Cancer Program, and other specified types of cancer programs.

<sup>b</sup>Based on patient's zip code area.

<sup>c</sup>Percent of people in the patient's zip code area with no high-school diploma.

<sup>d</sup>Non-small cell not further defined.

**eTable 4.** Propensity Score–Adjusted Multivariable Cox Regression Model for Overall Survival in Tumors >5-7 cm

| Variables                            | Adjusted HR |           |         |
|--------------------------------------|-------------|-----------|---------|
|                                      | AHR         | 95% CI    | P Value |
| <b>Treatment</b>                     |             |           |         |
| Observation                          | 1           | Ref       |         |
| Adjuvant chemotherapy                | 0.61        | 0.54-0.70 | <.001   |
| <b>Age</b>                           | 1.03        | 1.02-1.04 | <.001   |
| <b>Sex</b>                           |             |           |         |
| Male                                 | 1           | Ref       |         |
| Female                               | 0.89        | 0.78-1.01 | .062    |
| <b>Race</b>                          |             |           |         |
| White                                | 1           | Ref       |         |
| Non-white                            | 1.01        | 0.83-1.24 | .90     |
| <b>Insurance</b>                     |             |           |         |
| Not insured                          | 0.90        | 0.56-1.46 | .68     |
| Private insurance                    | 1           | Ref       |         |
| Medicaid                             | 1.09        | 0.81-1.47 | .57     |
| Medicare                             | 0.86        | 0.73-1.01 | .07     |
| Other government                     | 1.20        | 0.67-2.14 | .55     |
| <b>Facility type</b>                 |             |           |         |
| Non-academic <sup>a</sup>            | 0.99        | 0.87-1.14 | .93     |
| Academic                             | 1           | Ref       |         |
| <b>Facility location</b>             |             |           |         |
| Northeast                            | 1           | Ref       |         |
| Midwest                              | 1.24        | 1.02-1.51 | .03     |
| South                                | 1.14        | 0.95-1.37 | .16     |
| West                                 | 1.12        | 0.89-1.42 | .34     |
| <b>Area of residence<sup>b</sup></b> |             |           |         |
| Rural                                | 0.95        | 0.62-1.44 | .80     |
| Urban                                | 0.98        | 0.82-1.17 | .84     |
| Metropolitan                         | 1           | Ref       |         |
| <b>Median income</b>                 |             |           |         |
| <38000                               | 1.05        | 0.82-1.36 | .69     |
| 38000 to 47999                       | 1.09        | 0.88-1.34 | .42     |
| 48000 to 62999                       | 1.08        | 0.90-1.30 | .42     |
| >63000                               | 1           | Ref       |         |

| Variables                                 | Adjusted HR |           |         |
|-------------------------------------------|-------------|-----------|---------|
|                                           | AHR         | 95% CI    | P Value |
| <b>Education, %<sup>c</sup></b>           |             |           |         |
| ≥21                                       | 0.90        | 0.69-1.18 | .46     |
| 13 to 20.9                                | 1.02        | 0.82-1.27 | .86     |
| 7 to 12.9                                 | 1.01        | 0.84-1.23 | .90     |
| <7                                        | 1           | Ref       |         |
| <b>Year of diagnosis</b>                  |             |           |         |
| 2010                                      | 1           | Ref       |         |
| 2011                                      | 0.86        | 0.71-1.05 | .14     |
| 2012                                      | 0.88        | 0.72-1.07 | .20     |
| 2013                                      | 0.84        | 0.69-1.04 | .11     |
| 2014                                      | 1.02        | 0.83-1.26 | .85     |
| 2015                                      | 0.97        | 0.76-1.23 | .78     |
| <b>Histology</b>                          |             |           |         |
| Adenocarcinoma                            | 1           | Ref       |         |
| SCC                                       | 1.06        | 0.92-1.21 | .44     |
| Large cell                                | 1.02        | 0.71-1.48 | .90     |
| Other <sup>d</sup>                        | 0.81        | 0.56-1.18 | .27     |
| <b>Laterality</b>                         |             |           |         |
| Right                                     | 1           | Ref       |         |
| Left                                      | 0.82        | 0.72-0.94 | .003    |
| <b>Primary site</b>                       |             |           |         |
| Main bronchus                             | 3.41        | 1.28-9.13 | .01     |
| Upper lobe                                | 1           | Ref       |         |
| Middle lobe                               | 1.07        | 0.77-1.48 | .67     |
| Lower lobe                                | 1.20        | 1.06-1.37 | .01     |
| Overlapping lesion                        | 1.15        | 0.80-1.64 | .45     |
| Lung, NOS                                 | 1.68        | 1.08-2.61 | .02     |
| <b>VPI</b>                                |             |           |         |
| Absent                                    | 1           | Ref       |         |
| Present                                   | 1.23        | 1.03-1.48 | .03     |
| <b>LVI</b>                                |             |           |         |
| Absent                                    | 1           | Ref       |         |
| Present                                   | 1.39        | 1.18-1.64 | .004    |
| <b>Grade</b>                              |             |           |         |
| Well differentiated                       | 1           | Ref       |         |
| Moderately differentiated                 | 1.28        | 0.99-1.67 | .06     |
| Poorly differentiated or undifferentiated | 1.46        | 1.12-1.89 | .005    |

| Variables                  | Adjusted HR |           |         |
|----------------------------|-------------|-----------|---------|
|                            | AHR         | 95% CI    | P Value |
| <b>Surgical resection</b>  |             |           |         |
| Sublobar resection         | 1.27        | 0.90-1.79 | .18     |
| Lobectomy                  | 1           | Ref       |         |
| Pneumonectomy              | 1.31        | 1.01-1.68 | .04     |
| <b>Charlson-Deyo score</b> |             |           |         |
| 0                          | 1           | Ref       |         |
| 1                          | 1.07        | 0.93-1.23 | .34     |
| ≥2                         | 1.39        | 1.18-1.64 | <.001   |

AHR=Adjusted hazard ratio; CI=Confidence interval; Ref=Reference; NOS=Not otherwise specified; VPI=Visceral pleural invasion; LVI=Lymphovascular invasion.

<sup>a</sup>Includes Community Cancer Program, Comprehensive Community Cancer Program, Integrated Network Cancer Program, and other specified types of cancer programs.

<sup>b</sup>Based on patient's zip code area.

<sup>c</sup>Percent of people in the patient's zip code area with no high-school diploma.

<sup>d</sup>Non-small cell not further defined.

**eTable 5.** Association of High-Risk Features and Survival After Adjuvant Chemotherapy in Different Tumor Size Categories ( $\leq 3$  cm,  $>3$ -4 cm,  $>4$ -5 cm and  $>5$ -7 cm)

“Overall” refers to all comers in the size category irrespective of high-risk features. LVI indicates lymphovascular invasion; VPI, visceral pleural invasion; high-grade, poor differentiation or undifferentiated.

| Features                           | Total | Adjuvant chemotherapy, No. (%) | HR   |           |         |
|------------------------------------|-------|--------------------------------|------|-----------|---------|
|                                    |       |                                | HR   | 95% CI    | P Value |
| <b><math>\leq 3</math> cm</b>      |       |                                |      |           |         |
| Overall                            | 36220 | 1044 (2.88)                    | 1.10 | 0.96-1.26 | .17     |
| LVI                                | 3508  | 229 (6.53)                     | 0.88 | 0.66-1.16 | .35     |
| VPI                                | 2813  | 297 (10.56)                    | 0.90 | 0.72-1.14 | .38     |
| High-grade                         | 10402 | 465 (4.47)                     | 1.02 | 0.84-1.25 | .81     |
| $\geq 2$ risk factors <sup>a</sup> | 2598  | 247 (9.51)                     | 0.92 | 0.76-1.11 | .40     |
| Sublobar resection <sup>b</sup>    | 10891 | 439 (4.03)                     | 1.07 | 0.85-1.33 | .53     |
| <b><math>&gt;3</math>-4 cm</b>     |       |                                |      |           |         |
| Overall                            | 7501  | 896 (11.95)                    | 0.90 | 0.78-1.03 | .21     |
| LVI                                | 986   | 174 (17.65)                    | 0.82 | 0.60-1.11 | .21     |
| VPI                                | 779   | 123 (15.79)                    | 0.76 | 0.51-1.12 | .22     |
| High-grade                         | 2954  | 488 (16.52)                    | 1.04 | 0.86-1.25 | .64     |
| $\geq 2$ risk factors <sup>a</sup> | 835   | 163 (19.52)                    | 0.96 | 0.73-1.26 | .23     |
| Sublobar resection <sup>b</sup>    | 1172  | 145 (12.37)                    | 0.72 | 0.56-0.93 | .004    |
| <b><math>&gt;4</math>-5 cm</b>     |       |                                |      |           |         |
| Overall                            | 3711  | 935 (25.20)                    | 0.75 | 0.64-0.86 | <.001   |
| LVI                                | 537   | 152 (28.31)                    | 0.62 | 0.42-0.91 | .005    |
| VPI                                | 413   | 119 (28.81)                    | 0.50 | 0.32-0.79 | <.001   |
| High-grade                         | 1644  | 492 (29.93)                    | 0.58 | 0.47-0.72 | <.001   |
| $\geq 1$ risk factor <sup>a</sup>  | 2057  | 596 (28.97)                    | 0.67 | 0.56-0.80 | .02     |
| 0 risk factor <sup>a</sup>         | 1654  | 339 (20.50)                    | 1.06 | 0.81-1.40 | .37     |
| <b><math>&gt;5</math> cm</b>       |       |                                |      |           |         |
| Overall                            | 3949  | 1345 (34.06)                   | 0.69 | 0.62-0.78 | <.001   |
| LVI                                | 684   | 303 (44.30)                    | 0.46 | 0.34-0.62 | <.001   |
| VPI                                | 573   | 255 (44.50)                    | 0.60 | 0.43-0.85 | .004    |
| High-grade                         | 2253  | 1002 (44.47)                   | 0.64 | 0.55-0.75 | <.001   |
| 0 risk factor <sup>a</sup>         | 1940  | 769 (39.64)                    | 0.75 | 0.61-0.91 | .004    |

<sup>a</sup>VPI, LVI or high-grade histology.

<sup>b</sup>In the extended (2004-2015) cohort.

**eTable 6.** Association of High-Risk Features and Survival After Adjuvant Chemotherapy in  $\leq 3$  cm Tumors After Adjustments for Clinically Significant Interactions

“Overall” refers to all comers in the size category irrespective of high-risk features. LVI indicates lymphovascular invasion; VPI, visceral pleural invasion; high-grade, poor differentiation or undifferentiated.

| Features                           | HR   |           |                |
|------------------------------------|------|-----------|----------------|
|                                    | HR   | 95% CI    | <i>P</i> Value |
| <b><math>\leq 3</math> cm</b>      |      |           |                |
| Overall                            | 1.54 | 1.31-1.82 | <.001          |
| LVI                                | 0.91 | 0.69-1.21 | .52            |
| VPI                                | 0.78 | 0.57-1.07 | .12            |
| High-grade                         | 1.16 | 0.96-1.41 | .12            |
| $\geq 2$ risk factors <sup>a</sup> | 0.63 | 0.25-1.61 | .33            |
| Sublobar resection <sup>b</sup>    | 1.18 | 0.98-1.41 | .077           |

<sup>a</sup>VPI, LVI or high-grade histology.

<sup>b</sup>In the extended (2004-2015) cohort.



**eTable 7.** Association of Sublobar Surgery With Survival After Adjuvant Chemotherapy in  $\leq 4$  cm Cohort According to 1-cm Tumor Size Increments

| Tumor size | Total | Adjuvant chemotherapy, No. (%) | HR   |           |                |
|------------|-------|--------------------------------|------|-----------|----------------|
|            |       |                                | HR   | 95% CI    | <i>P</i> Value |
| 0.1-1 cm   | 1630  | 51 (3.13)                      | 1.38 | 0.87-2.20 | .07            |
| 1.1-2 cm   | 6098  | 210 (3.44)                     | 1.14 | 0.91-1.45 | .59            |
| 2.1-3 cm   | 3122  | 168 (5.38)                     | 1.13 | 0.88-1.44 | .53            |
| 3.1-4 cm   | 1172  | 145 (12.37)                    | 0.72 | 0.56-0.93 | .004           |

**eTable 8.** Association of High-Risk Features and Survival (Measured From the Date of Diagnosis) After Adjuvant Chemotherapy in Different Tumor Size Categories ( $\leq 3$  cm,  $>3-4$  cm,  $>4-5$  cm and  $>5-7$  cm)

“Overall” refers to all comers in the size category irrespective of high-risk features. LVI indicates lymphovascular invasion; VPI, visceral pleural invasion; high-grade, poor differentiation or undifferentiated.

| Features                           | HR   |           |         |
|------------------------------------|------|-----------|---------|
|                                    | HR   | 95% CI    | P Value |
| <b><math>\leq 3</math> cm</b>      |      |           |         |
| Overall                            | 0.99 | 0.83-1.19 | .94     |
| LVI                                | 0.83 | 0.59-1.16 | .27     |
| VPI                                | 0.71 | 0.51-1.21 | .59     |
| High-grade                         | 0.99 | 0.76-1.29 | .94     |
| $\geq 2$ risk factors <sup>a</sup> | 0.81 | 0.75-1.11 | .32     |
| Sublobar resection <sup>b</sup>    | 1.04 | 0.63-1.28 | .71     |
| <b><math>&gt;3-4</math> cm</b>     |      |           |         |
| Overall                            | 0.83 | 0.69-1.01 | .06     |
| LVI                                | 0.75 | 0.50-1.12 | .16     |
| VPI                                | 0.82 | 0.50-1.33 | .41     |
| High-grade                         | 0.86 | 0.67-1.12 | .24     |
| $\geq 2$ risk factors <sup>a</sup> | 0.93 | 0.84-1.02 | .13     |
| Sublobar resection <sup>b</sup>    | 0.68 | 0.54-0.89 | .003    |
| <b><math>&gt;4-5</math> cm</b>     |      |           |         |
| Overall                            | 0.79 | 0.66-0.96 | .01     |
| LVI                                | 0.55 | 0.35-0.86 | .009    |
| VPI                                | 0.37 | 0.21-0.64 | .004    |
| High-grade                         | 0.72 | 0.56-0.94 | .01     |
| $\geq 1$ risk factor <sup>a</sup>  | 0.75 | 0.70-0.81 | <.001   |
| 0 risk factor <sup>a</sup>         | 0.98 | 0.89-1.07 | .59     |
| <b><math>&gt;5</math> cm</b>       |      |           |         |
| Overall                            | 0.61 | 0.51-0.73 | <.001   |
| LVI                                | 0.31 | 0.19-0.51 | <.001   |
| VPI                                | 0.84 | 0.53-0.89 | .005    |
| High-grade                         | 0.57 | 0.45-0.74 | <.001   |
| 0 risk factor <sup>a</sup>         | 0.72 | 0.66-0.78 | <.001   |

<sup>a</sup>VPI, LVI or high-grade histology.

<sup>b</sup>In the extended (2004-2015) cohort.
